# Supplementary material for: Hot-Melt Extrusion Enhances Antioxidant Effects of Mulberry on Probiotics and Pathogenic Microorganisms
Source: MDPI journal article supplement (doi:10.3390/antiox11112301), 2022-11-21
Supplement: s1 [file s1]

## Supplementary Materials

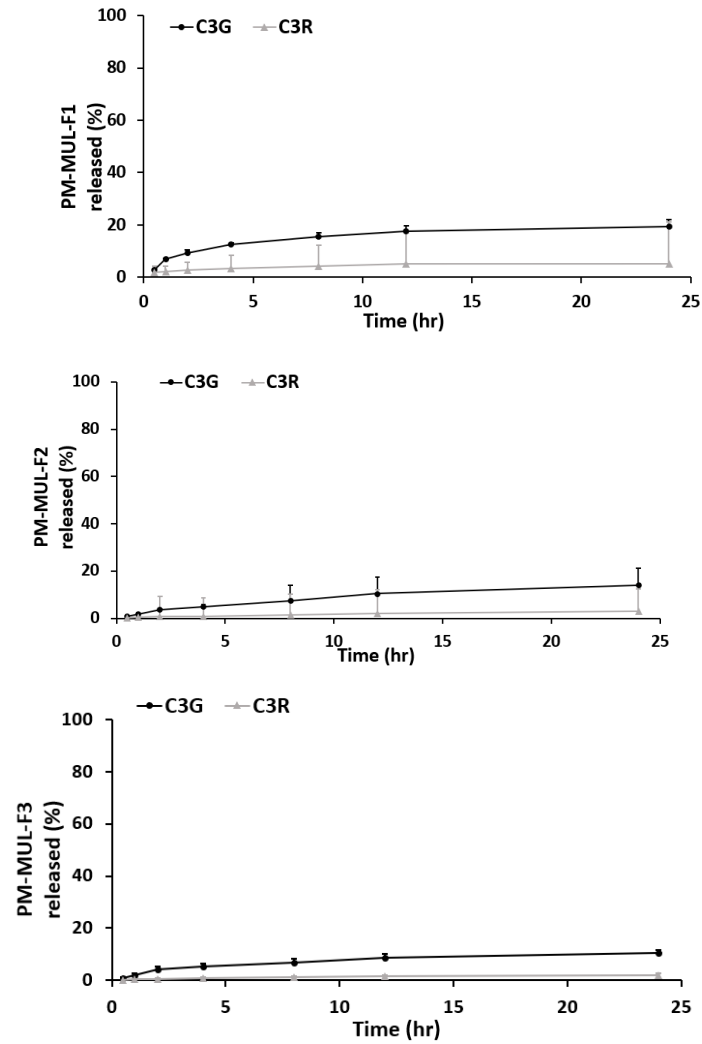

**Figure S1.** Release profile of ACN (C3G and C3R) from PM (physical mixture)-MUL-F1, F2, F3 in gastrointestinal tract simulation. SGF: simulated gastric fluid, from initial and 2 hr (0, 0.5, 1, and 2 hr), SIF: simulated intestinal fluid from 2 hr to 24 hr (4, 8, 12, and 24 hr).

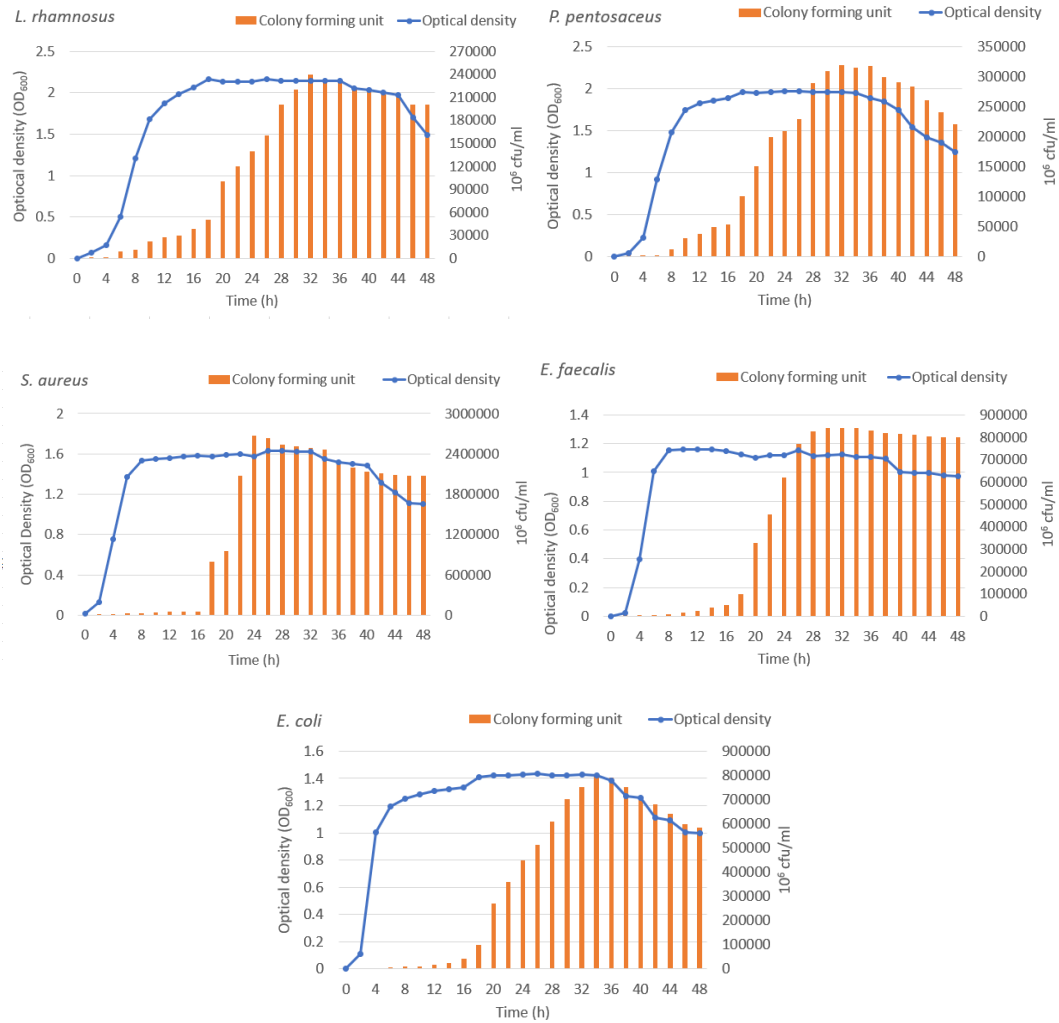

**Figure S2.** Lactic acid bacteria and pathogen bacterial growths characteristics of *L. rhamnosus*, *P. pentosaceus*, *S. aureus*, *E. faecalis*, and *E. coli* with correlation of optical density (OD<sub>600</sub>) and colony forming unit.
